# Supplementary material
Source: HighWire-hosted journal article supplement (https://www.cmaj.ca/highwire/filestream/58097/field_highwire_adjunct_files/0/scurvy-smith-1-at.pdf)

Appendix 1: Axial  $T_2$ -weighted fat-saturated magnetic resonance images of the thighs showing peripheral muscle edema as increased signal (white arrows) and deep fascial edema (black arrows).

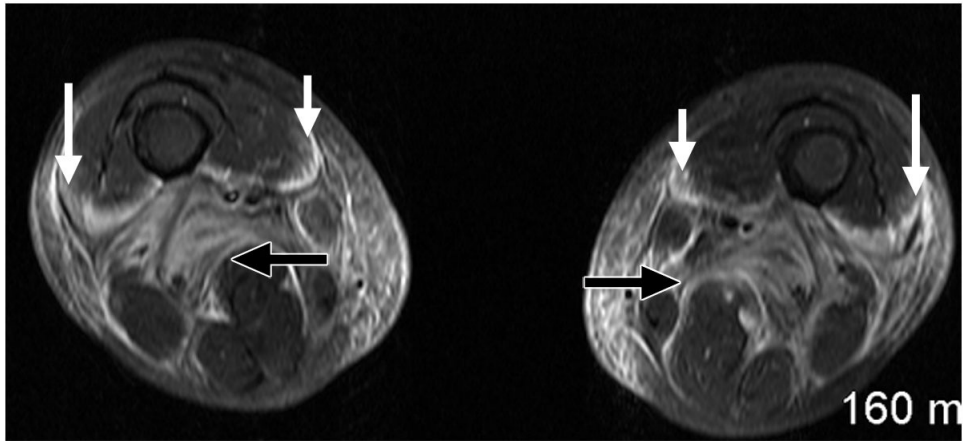

Supplement: scurvy-smith-1-at.pdf [file scurvy-smith-1-at.pdf]
